# Supplementary material for: Implications of ZnO Nanoparticles and S-Nitrosoglutathione on Nitric Oxide, Reactive Oxidative Species, Photosynthetic Pigments, and Ionomic Profile in Rice
Source: MDPI journal article supplement (doi:10.3390/antiox12101871), 2023-10-17
Supplement: s1 [file s1]

## Supplementary material

**Table S1** Elemental concentration of ZnO NPs, GSNO and ZnO NPs + GSNO in rice husks and grains ( $\mu\text{g kg}^{-1}$ ), n=4.

| Grain Husk |         |        |         |          | Grain Husk |         |         |        |  |
|------------|---------|--------|---------|----------|------------|---------|---------|--------|--|
| Control    |         |        |         |          | GSNO       |         |         |        |  |
|            | Mean    | Error  | Mean    | Error    | Mean       | Error   | Mean    | Error  |  |
| Na         | 59501   | 17365  | 1641410 | 350117.8 | 48950      | 6059    | 1020258 | 178495 |  |
| Mg         | 1288939 | 61628  | 808558  | 42141.3  | 1262285    | 21704   | 614826  | 52212  |  |
| P          | 4182826 | 173251 | 1183496 | 171867.3 | 4185603    | 69017   | 651794  | 82401  |  |
| K          | 3073680 | 144689 | 8315633 | 269122.0 | 3187861    | 32629   | 6415822 | 443682 |  |
| Ca         | 96694   | 7799   | 565796  | 43211.5  | 99935      | 1413    | 504356  | 39808  |  |
| Cr         | 38      | 10.5   | 680     | 80.1     | 23         | 1.42    | 596     | 27.4   |  |
| Mn         | 13453   | 966.9  | 50180   | 3743.0   | 13074      | 908.79  | 36882   | 5890.2 |  |
| Fe         | 6562    | 527.9  | 15001   | 1128.6   | 8213       | 367.12  | 12956   | 360.4  |  |
| Co         | 5       | 0.4    | 27      | 1.7      | 5          | 0.26    | 31      | 1.2    |  |
| Ni         | 60      | 2.7    | 661     | 68.2     | 57         | 3.31    | 747     | 60.9   |  |
| Cu         | 2365    | 190.4  | 2374    | 164.1    | 2160       | 62.17   | 2838    | 283.3  |  |
| Zn         | 20184   | 757.2  | 21191   | 392.1    | 19585      | 1109.93 | 23393   | 1454.0 |  |
| As         | 89      | 8.8    | 119     | 4.9      | 130        | 6.20    | 146     | 7.9    |  |
| Cd         | 33      | 10.7   | 27      | 2.2      | 23         | 4.59    | 8       | 2.7    |  |
| Pb         | 152     | 15.0   | 28      | 2.0      | 92         | 38.17   | 41      | 4.7    |  |

  

| Grain Husk |         |        |         |        | Grain Husk     |        |         |        |  |
|------------|---------|--------|---------|--------|----------------|--------|---------|--------|--|
| ZnO NPs    |         |        |         |        | ZnO NPs + GSNO |        |         |        |  |
|            | Mean    | Error  | Mean    | Error  | Mean           | Error  | Mean    | Error  |  |
| Na         | 77659   | 16256  | 1323540 | 366868 | 35116          | 4754   | 595354  | 73151  |  |
| Mg         | 1197117 | 35406  | 470155  | 80227  | 1268028        | 25285  | 508405  | 39432  |  |
| P          | 4126376 | 105973 | 618284  | 81963  | 4176406        | 97827  | 435163  | 29955  |  |
| K          | 2990985 | 52861  | 6066113 | 317863 | 3153602        | 96778  | 5948433 | 341589 |  |
| Ca         | 98125   | 2137   | 457882  | 10426  | 102769         | 5316   | 486856  | 24437  |  |
| Cr         | 32      | 4.7    | 473     | 54.0   | 32             | 4.24   | 568     | 62.7   |  |
| Mn         | 14063   | 1463.0 | 46623   | 7571.9 | 16862          | 595.43 | 56047   | 3704.2 |  |
| Fe         | 6818    | 84.0   | 11377   | 681.6  | 7636           | 208.92 | 11106   | 568.4  |  |
| Co         | 4       | 0.2    | 23      | 0.2    | 6              | 0.43   | 27      | 1.6    |  |
| Ni         | 76      | 4.5    | 733     | 87.8   | 71             | 5.16   | 722     | 32.9   |  |
| Cu         | 1773    | 187.3  | 2421    | 196.3  | 1755           | 541.94 | 2187    | 250.1  |  |
| Zn         | 19420   | 788.1  | 35272   | 2191.4 | 20957          | 974.31 | 35779   | 3675.8 |  |
| As         | 107     | 6.9    | 128     | 9.1    | 110            | 7.30   | 106     | 2.9    |  |
| Cd         | 39      | 6.4    | 12      | 1.7    | 20             | 3.22   | 13      | 4.4    |  |
| Pb         | 283     | 92.5   | 20      | 3.8    | 83             | 24.28  | 21      | 1.4    |  |

**Table S2** Elemental concentration of ZnO NPs, GSNO and ZnO NPs + GSNO in rice roots and shoots ( $\mu\text{g kg}^{-1}$ ), n=4.

| Control |          |          |          |          | GSNO     |         |          |         |
|---------|----------|----------|----------|----------|----------|---------|----------|---------|
| Roots   |          | Shoots   |          |          | Roots    |         | Shoots   |         |
|         | Mean     | Error    | Mean     | Error    | Mean     | Error   | Mean     | Error   |
| Na      | 393465   | 276045   | 1502384  | 1431180  | 1258919  | 643348  | 1138695  | 921456  |
| Mg      | 684567   | 221363   | 3020752  | 785389   | 802672   | 118480  | 1951225  | 539578  |
| P       | 386069   | 205120   | 626388   | 406576   | 622901   | 378453  | 629576   | 368025  |
| K       | 393443   | 142131   | 22421711 | 13413304 | 1104432  | 572130  | 22443278 | 2418901 |
| Ca      | 3363205  | 965941   | 905073   | 523197   | 3646350  | 691843  | 993521   | 348187  |
| Cr      | 6044     | 4474     | 106      | 34       | 4314     | 1436    | 103      | 52      |
| Mn      | 67181    | 40424    | 44399    | 28266    | 89865    | 22872   | 71956    | 28144   |
| Fe      | 27248834 | 15006591 | 63612    | 51930    | 32651303 | 4971352 | 45895    | 55243   |
| Co      | 950      | 219      | 47       | 14       | 1034     | 185     | 42       | 21      |
| Ni      | 2035     | 618      | 107      | 89       | 2093     | 614     | 37       | 14      |
| Cu      | 3942     | 973      | 694      | 183      | 3233     | 959     | 337      | 136     |
| Zn      | 35721    | 10505    | 31632    | 6566     | 34636    | 8391    | 32846    | 12518   |
| As      | 17847    | 3991     | 341      | 100      | 15275    | 3211    | 150      | 88      |
| Cd      | 1167     | 445      | 53       | 36       | 848      | 328     | 44       | 32      |
| Pb      | 108      | 67       | 27       | 24       | 113      | 58      | 15       | 11      |

| ZnO NPs |          |         |          |         | ZnO NPs + GSNO |         |          |         |
|---------|----------|---------|----------|---------|----------------|---------|----------|---------|
| Roots   |          | Shoots  |          |         | Roots          |         | Shoots   |         |
|         | Mean     | Error   | Mean     | Error   | Mean           | Error   | Mean     | Error   |
| Na      | 547254   | 182491  | 652170   | 393878  | 681651         | 163913  | 1539220  | 825257  |
| Mg      | 586859   | 153046  | 2239802  | 330118  | 805358         | 128904  | 1694505  | 569892  |
| P       | 441389   | 234167  | 970482   | 524416  | 446306         | 50964   | 482824   | 357615  |
| K       | 813061   | 467813  | 17670400 | 3934239 | 705563         | 138798  | 21871005 | 7165888 |
| Ca      | 2563901  | 1152645 | 1117149  | 378817  | 3397272        | 779651  | 897334   | 348792  |
| Cr      | 5362     | 2147    | 64       | 9       | 6093           | 1652    | 87       | 50      |
| Mn      | 71167    | 39863   | 53077    | 21275   | 80219          | 27153   | 59950    | 29488   |
| Fe      | 24142633 | 5408367 | 61571    | 26762   | 24888407       | 4616985 | 53266    | 12821   |
| Co      | 1095     | 463     | 48       | 17      | 964            | 100     | 56       | 11      |
| Ni      | 1773     | 734     | 47       | 20      | 2361           | 498     | 61       | 46      |
| Cu      | 5352     | 1847    | 786      | 498     | 5118           | 1643    | 570      | 338     |
| Zn      | 43471    | 27540   | 39997    | 11624   | 43057          | 10312   | 40457    | 11559   |
| As      | 9214     | 3185    | 315      | 113     | 14921          | 4544    | 180      | 91      |
| Cd      | 1092     | 339     | 52       | 26      | 1159           | 206     | 40       | 49      |
| Pb      | 704      | 883     | 29       | 20      | 199            | 131     | 21       | 14      |
